# Supplementary material for: 1H NMR detection of small molecules in human urine with a deep cavitand synthetic receptor
Source: Royal Society of Chemistry journal article supplement (doi:10.1039/c2an36635e), 2012-12-21
Supplement: c2an36635e.pdf [file c2an36635e.pdf]

# **$^1\text{H}$ NMR Detection of Small-Molecules in Human Urine with a Deep Cavitand Synthetic Receptor**

Daniel A. Ryan<sup>a</sup> and Julius Rebek Jr.\*<sup>a</sup>

The Skaggs Institute for Chemical Biology and Department of Chemistry, The Scripps Research Institute, 10550 North Torrey Pines Road, La Jolla, California 92037

jrebek@scripps.edu

## **Supporting Information**

### **Table of Contents**

|                                                                                                                             |    |
|-----------------------------------------------------------------------------------------------------------------------------|----|
| I. Instrumentation and Materials.....                                                                                       | 2  |
| II. Spectroscopic and HPLC characterization of Cavitand <b>1</b> .....                                                      | 3  |
| III. Solubility Determination and $^1\text{H}$ NMR spectra of Cavitand <b>1</b> in Human Urine.....                         | 6  |
| IV. Binding Constant Determination for Cavitand <b>1</b> in Human Urine.....                                                | 8  |
| V. $^1\text{H}$ NMR Spectra of Urine Caviplexes and Reference Spectra of Complexes and Guests in $\text{D}_2\text{O}$ ..... | 9  |
| VI. Model of Cavitand Dimer .....                                                                                           | 12 |
| VII. References.....                                                                                                        | 13 |

## I. Instrumentation and Materials

**Instrumentation.**  $^1\text{H}$  and  $^{13}\text{C}$  NMR spectra were obtained at 600 MHz and 150 MHz on a Bruker DRX-600 spectrometer equipped with a 5 mm QNP probe; alternatively, some  $^{13}\text{C}$  NMR spectra were obtained on a Bruker DRX-600 spectrometer equipped with a 5 mm cryoprobe. Spectra were recorded at 310 K unless otherwise stated. Chemical shifts are expressed in parts per million ( $\delta$  scale) with respect to tetramethylsilane for chloroform- $d_3$  or dimethylsulfoxide- $d_6$ , or to sodium 3-(trimethylsilyl)propionate 2,2,3,3- $d_4$  for  $\text{D}_2\text{O}$  and biofluids analysis. Data are presented as follows: 1) chemical shift, 2) multiplicity (s = singlet, d = doublet, t = triplet, q = quartet, m = multiplet and/or multiple resonances, b = broadened signal, app = apparent splitting pattern; otherwise Pople notation is used to describe spin systems with non-first order effects), 3) coupling constant (Hz), 4) integration, and 5) assignment.  $^1\text{H}$  NMR assignments were generally supported by COSY, HMQC, and APT experiments. Mass spectrometry was performed at the Scripps Center for Metabolomics and Mass Spectrometry with an Agilent ESI-TOF instrument or an Applied Biosystems DE instrument for MALDI-TOF. All molecular modeling and semi-empirical calculations were performed using Spartan '04 Windows and graphically modeled using the PyMol visualization software (Schrödinger).

**Materials.** The carbohydrate-conjugated cavitand was synthesized and purified by preparative HPLC protocols as previously described.<sup>1</sup> Quinuclidine hydrochloride and amantadine hydrochloride were purchased from Sigma-Aldrich (St. Louis, USA). Freeze-dried pooled human urine (Kova-Trol III) was supplied by Hycor Biomedical and purchased through VWR. NMR solvents dimethylsulfoxide- $d_6$ , acetone- $d_6$ , and  $\text{D}_2\text{O}$  (100%  $d$ , ampules), as well as the NMR standard sodium 3-(trimethylsilyl)propionate 2,2,3,3- $d_4$  (TMSP), were purchased from Cambridge Isotope Laboratories, Inc. All other reagents and solvents were purchased from commercial suppliers and used without additional purification.

**I. Spectroscopic and HPLC characterization of Cavitant 1.**

*Characterization of the cavitant 1 in DMSO-*d*6:* A portion of cavitant **1** was lyophilized from deuterium oxide (2x) and characterized in DMSO-*d*6, which in this solvent provided a spectrum lacking the complex splitting patterns observed in water.

<sup>1</sup>H NMR (600 MHz, DMSO-*d*6): δ = 9.22 (s, NH), 8.12 (s, 4H, *H*-triazole), 7.59 (broad s, 12H, Ar*H*), 7.20 (broad s, 4H, Ar*H*), 5.03 (app s, 4H, HO-C<sub>2</sub><sup>Glc</sup>), 4.92 (m, 8H, HO-C<sub>3</sub><sup>Glc</sup>, HO-C<sub>4</sub><sup>Glc</sup>), 4.85-4.61 (ABq, *J* = 11.4 Hz, 8H, O-CH<sub>2</sub>-C<sup>triazole</sup>), 4.55 (s, 4H, HO-C<sub>6</sub><sup>Glc</sup>), 4.40 (m, 8H, -CH<sub>2</sub>-N<sup>triazole</sup>), 4.28 (d, *J* = 7.76 Hz, 4H, H1<sup>Glc</sup>), 3.71 (s, 4H, H6<sup>Glc</sup>), 3.47 (s, 4H, H6'<sup>Glc</sup>), 3.14 (app s, 8H, including H5<sup>Glc</sup>), 3.06 (s, 4H), 2.99 (s, 4H, H2<sup>Glc</sup>), 2.34 (m, 32H overlaps with solvent, -(O)CCH<sub>2</sub>CH<sub>3</sub>, -CH<sub>2</sub>-CH<sup>methine</sup>), 1.77 (broad s, 8H, -CH<sub>2</sub>-), 1.09 (broad s, 24 H, -(O)CCH<sub>2</sub>CH<sub>3</sub>) ppm. <sup>13</sup>C NMR (150 MHz, DMSO-*d*6): 172.3, 157.7, 157.5, 153.9 (broad), 143.9, 127.9 (broad), 125.1, 124.1, 102.2, 77.0, 76.7, 73.4, 70.1, 61.5, 61.2, 48.9, 33.5 (broad), 29.3, 28.4, 9.7, 1.1 ppm. MS (MALDI-TOF)<sup>+</sup>: *m/z* calcd. For C<sub>124</sub>H<sub>148</sub>N<sub>20</sub>O<sub>40</sub> [M+Na]<sup>+</sup>: 2580; found 2580.3.

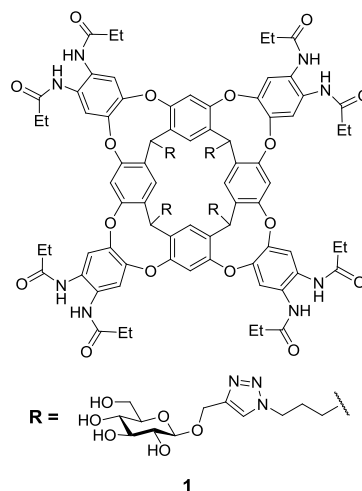

*Characterization of the cavitant dimer 1<sub>2</sub> in D<sub>2</sub>O:* <sup>1</sup>H NMR (600 MHz, D<sub>2</sub>O): δ = 7.87 and 7.85 (2 app s, 8H, *H*-triazole), 7.08-6.74 (broad m, 24H, Ar*H*), 6.46 (broad s, 4H, Ar*H*), 6.17 (broad s, 4H, Ar*H*), 4.88 (app s, 8H, overlaps with solvent peak), 4.81 (app s, 8H, overlaps with solvent peak), 4.46 (broad s, H, overlaps with solvent peak), 4.31-4.28 (broad m, 8H), 4.13 (broad s, 8H, CH<sup>methine</sup>), 3.72 (m, 8H), 3.57 (app s, 8H), 3.41 (app s, 8H), 3.32 (m, 16H), 3.24 (m, 8H), 2.53 and 2.41 (2 app s, broad, 32H, (O)CCH<sub>2</sub>CH<sub>3</sub>), 2.01 and 1.91 (2 app s, broad, 16H, -CH<sub>2</sub>-), 1.74 and 1.70 (2 app s, broad, 16H, -CH<sub>2</sub>-), 1.42-1.06 (m, 48H, (O)CCH<sub>2</sub>CH<sub>3</sub>) ppm; MS (MALDI-TOF)<sup>+</sup>: *m/z* calcd. For C<sub>248</sub>H<sub>296</sub>N<sub>40</sub>O<sub>80</sub> [2M+H]<sup>+</sup>: 5015; found 5014.

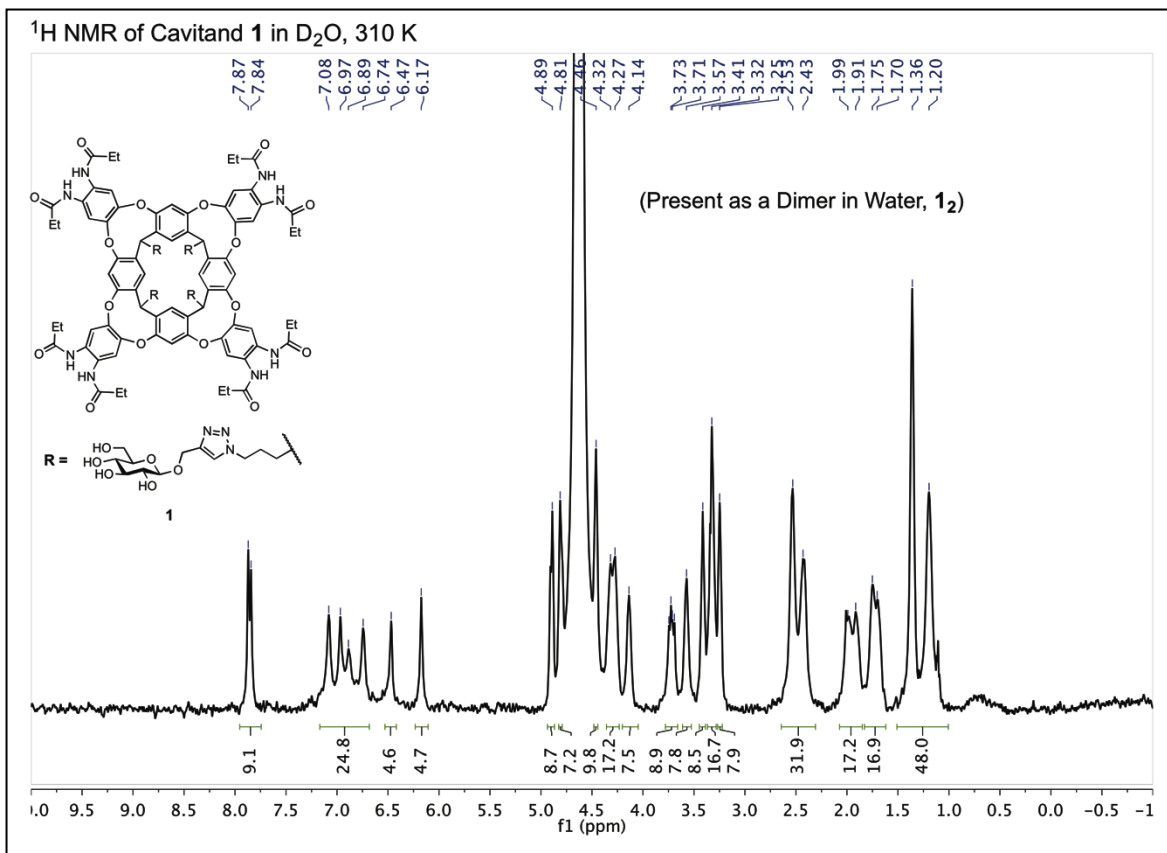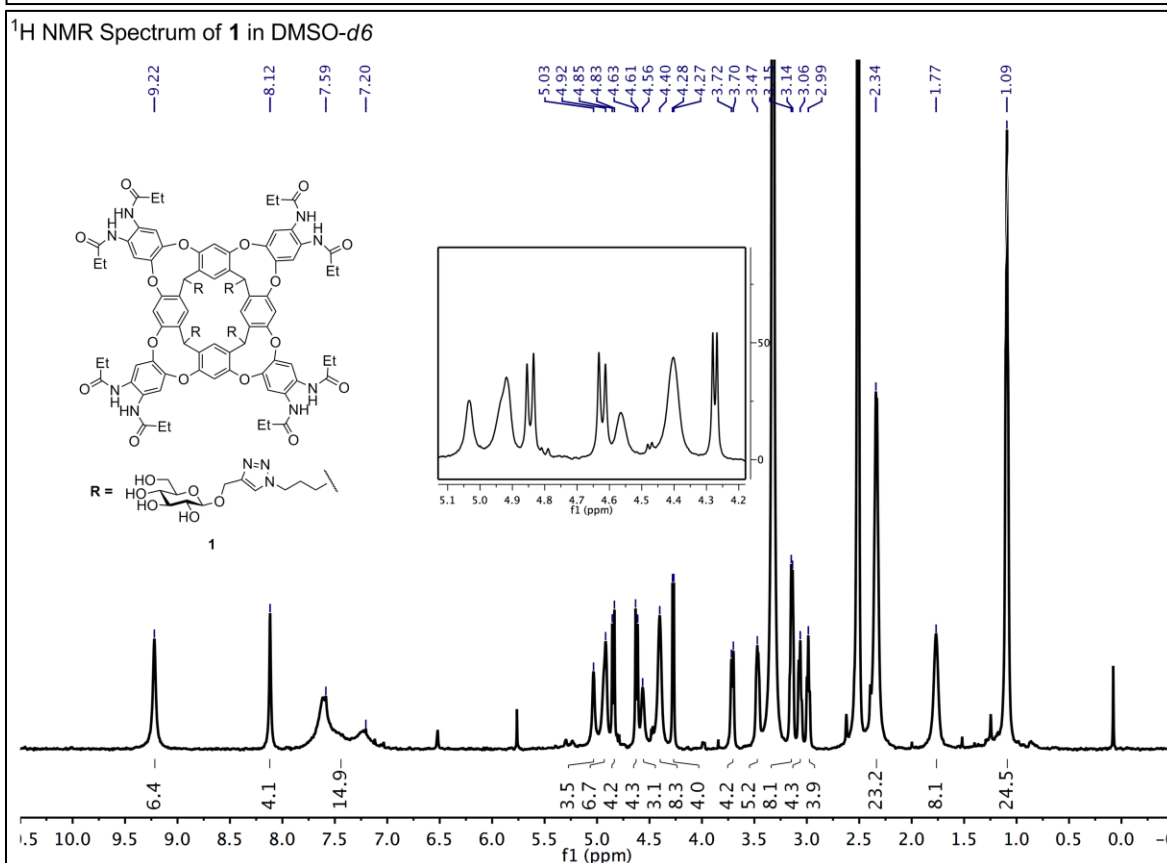

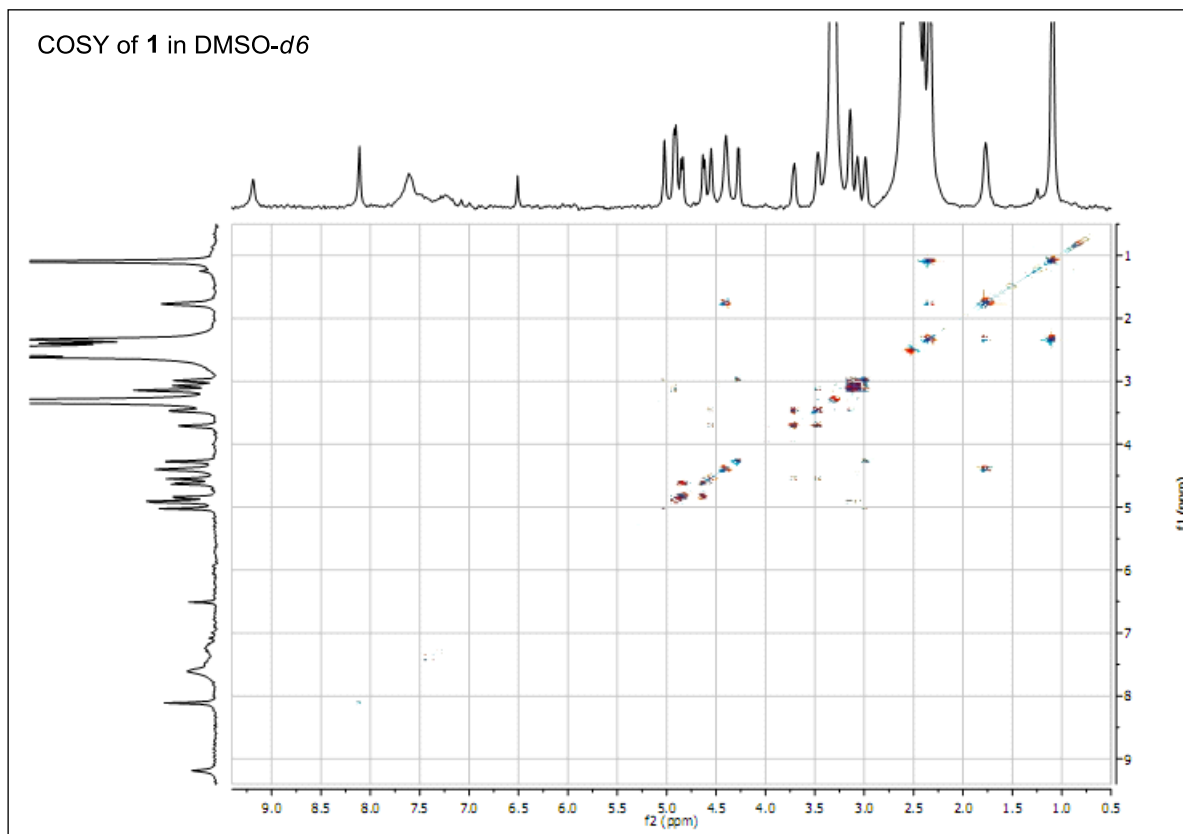

**Figure S1.** Preparative HPLC Chromatogram from purification of **1**.

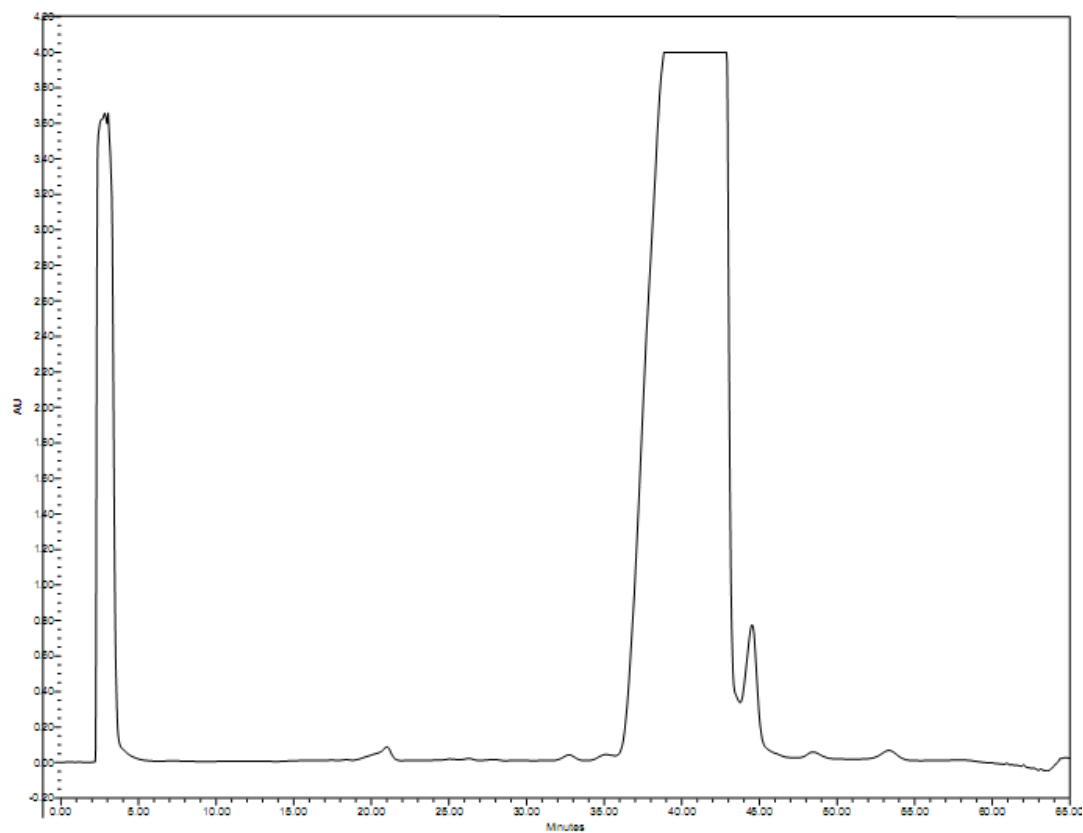

**III. Solubility Determination and  $^1\text{H}$  NMR Spectra of Cavitand 1 in Human Urine.**

**Preparation of External Standard for NMR Experiments.** The external standard was prepared as previously described<sup>1</sup>: A ~10 mM solution of sodium 3-(trimethylsilyl)propionate 2,2,3,3-*d*4 in deuterium oxide was prepared and syringe-injected into a Wilmad NMR capillary (#529-D) so that the height of the solution exceeds the height of the instrument receiver coil (approximately 75% of the tube volume). The capillary was carefully flame-sealed and then calibrated against 0.2 mM, 0.4 mM, and 0.8 mM standard solutions of adamantylamine hydrochloride using the following parameters:  $T_1$  (longest) = 3.6 s (the external standard),  $d1 = 5 \times T_1 = 18$  s,  $p1 = pw90 = 16.5$   $\mu\text{s}$ ,  $T = 310$  K, with a zg pulse sequence. Wilmad PTFE Insert Holder (529-B) and positioning rod (529-C) were used to introduce the capillary to the NMR tube. The same external standard was used in all experiments with Kontes 240 precision NMR tubes rated for >400 MHz applications and variation of wall thickness of: od = 4.97 mm (-0.013 mm) and id = 4.20 mm (+0.013 mm). The external standard had an effective concentration of 0.54 mM at 310K.

| Standard                    | ES Effective Concentration |
|-----------------------------|----------------------------|
| 0.2 mM AdNH <sub>3</sub> Cl | 0.55 mM                    |
| 0.4 mM AdNH <sub>3</sub> Cl | 0.53 mM                    |
| 0.8 mM AdNH <sub>3</sub> Cl | 0.53 mM                    |
| <b>Average</b>              | <b>0.54 mM</b>             |
| <b>St. Dev</b>              | 0.012 mM                   |

**Solubility of Cavitand 1 in urine.** Deuterium oxide (500  $\mu\text{L}$ ) was added to a dry mixture of cavitand **1** (0.6 mg, 0.235  $\mu\text{mol}$ ) and freeze-dried human urine powder (8.0 mg, taken from 110 mg freeze-dried powder from 15 mL total volume) in a Kontes 240 NMR tube. The resulting suspension was immersed in a 310 K water bath with periodic stirring using a Vortex Genie 2 and then the external standard was introduced using the Wilmad PTFE Insert Holder (529-B) and positioning rod (529-C). For spectrum acquisition, the sample was equilibrated at 310 K in the NMR instrument for 15 minutes and then a proton spectrum was acquired using the following parameters:  $T_1$  (longest) = 3.6 s (the external standard),  $d1 = 5 \times T_1 = 18$  s,  $p1 = pw90 = 16.5$   $\mu\text{s}$ ,  $ns = 233$ , without sample spinning. The same external standard was used in all experiments with a Kontes 240 precision NMR tubes. For spectrum processing, a Fourier Transform with a 4 Hz exponential function was applied, the spectrum was phased manually and baseline corrected.

Integration of the external standard with respect to the average of 2 resonances of the cavitand (those that were unobstructed by signals of the biofluid) provided a solubility of **1** of 70  $\mu\text{M}$  at 310K (or 35  $\mu\text{M}$  for **1**<sub>2</sub>), as shown below.

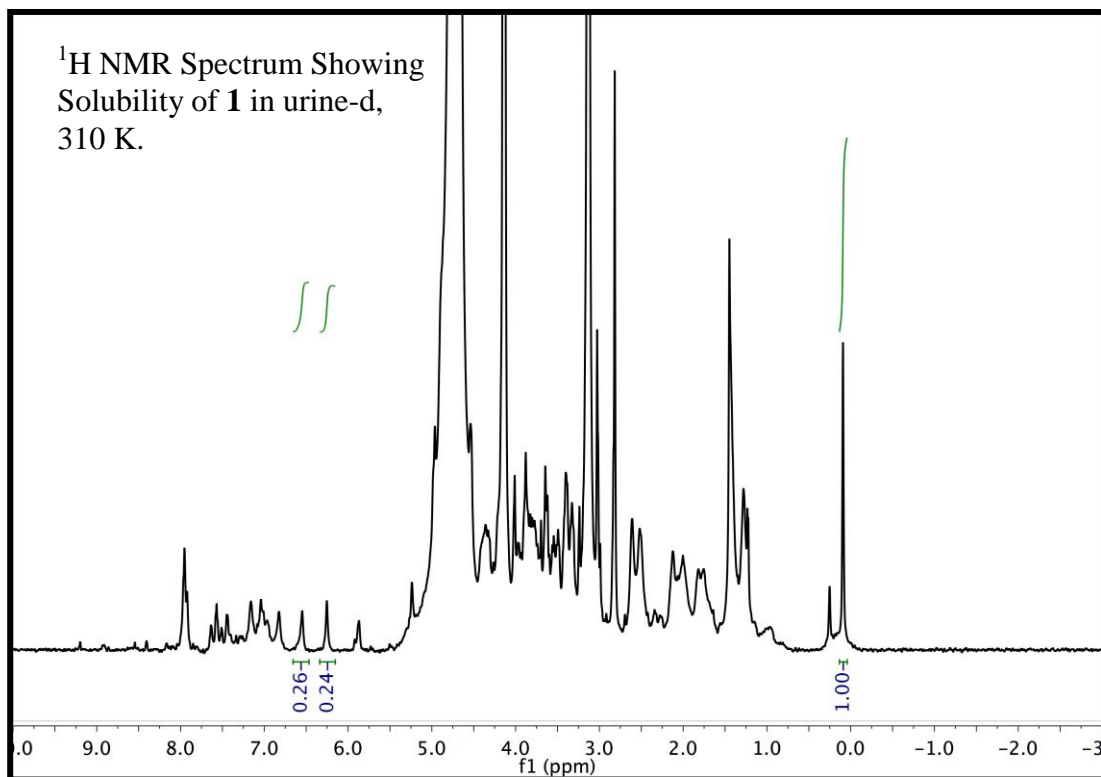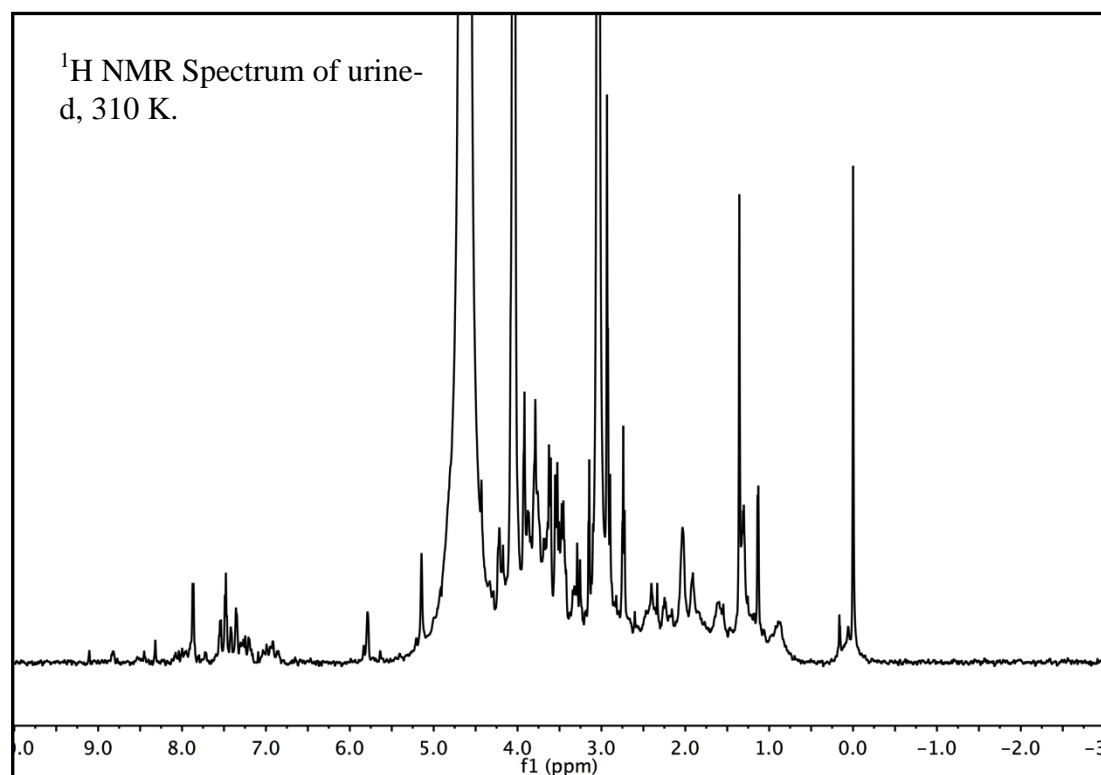

**IV. Binding Constant Determination for Cavitand 1 in Human Urine.**

Previously, we determined the binding constant expression of cavitand **1**, depicted in eq (1), that fits to a dimeric state of the cavitand observed in aqueous media.<sup>1</sup> Table S1 lists the binding constant data for quinuclidine hydrochloride and amantadine hydrochloride in urine-d and in D<sub>2</sub>O.

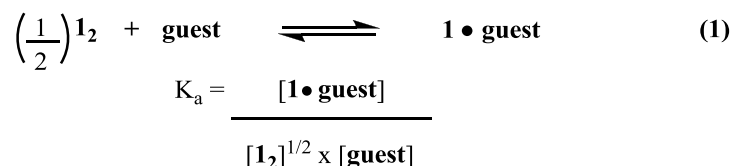

**Table S1. <sup>1</sup>H NMR Binding Constant Data for Encapsulation Complexes with Cavitand 1 at 310K (error estimated at +/- 15%).**

| Guest            | Solvent          | K <sub>a</sub> (mM <sup>-1/2</sup> ) | K <sub>a</sub> (M <sup>-1/2</sup> ) |
|------------------|------------------|--------------------------------------|-------------------------------------|
| Quinuclidine HCl | D <sub>2</sub> O | 0.19                                 | 6.0                                 |
| Quinuclidine HCl | Urine-d          | 0.11                                 | 3.5                                 |
| Amantadine HCl   | D <sub>2</sub> O | 0.055                                | 1.7                                 |
| Amantadine HCl   | Urine-d          | 0.037                                | 1.2                                 |

**Procedure for Binding Constant Determinations in urine.**

For a typical binding experiment, cavitand **1** (1.2 mg, 0.00047 mmol) was added to a one-dram vial, charged with deuterium oxide (1.0 mL, 99.96%-d), and stored in a 310 K water bath for 30 minutes with periodic agitation by a Vortex Genie. The saturated suspension of **1** thus obtained was filtered through a 0.45 μm PTFE syringe-filter (National Scientific) to provide a solution from which a 450 μL aliquot was syringe-transferred to a Kontes 240 NMR tube that contained freeze-dried human urine (8.0 mg, taken from 110 mg of freeze-dried powder from 15 mL of human urine).

For binding constant determination, a 10 μL aliquot of a standard solution of guest was added by syringe to the solution of **1**, followed by introduction of the NMR external standard capillary, prepared as described earlier. Binding constants were obtained at 310 K following pre-equilibration at this temperature for 10 minutes in the NMR probe. The <sup>1</sup>H NMR acquisition parameters were: d1 = 5 x T1 (longest) = 18 seconds (the external standard, 0.54 mM); p1 = pw90 = 16.5 μs, and no sample spinning. The FID was processed by a Fourier Transform



applying a 6 Hz exponential line-broadening function, followed by manual phasing, baseline correction, and integration. The equilibrium concentrations of cavitand and of the host-guest complex were determined directly from integration of their respective signals and comparison to the integral for the external concentration standard with an apparent concentration of 0.54 mM; the equilibrium concentration of free guest was determined from the total concentration of guest present from titration less the concentration of host-guest complex determined as above. The resulting K value is the average from at least 3 data points within 5 to 95% extent of complex formation.

## VI. $^1\text{H}$ NMR Spectra of Urine Caviplexes and Reference Spectra of Complexes and Guests in $\text{D}_2\text{O}$ .

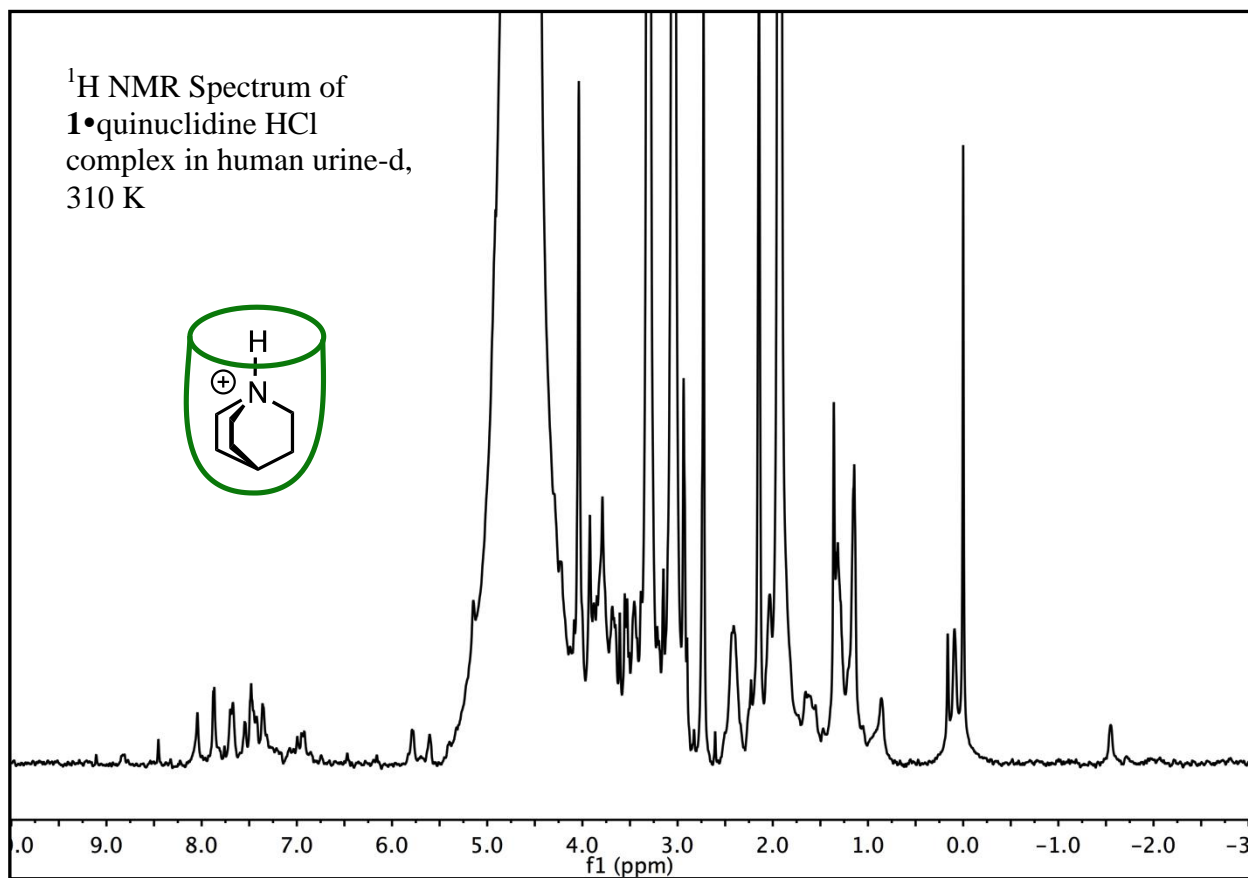

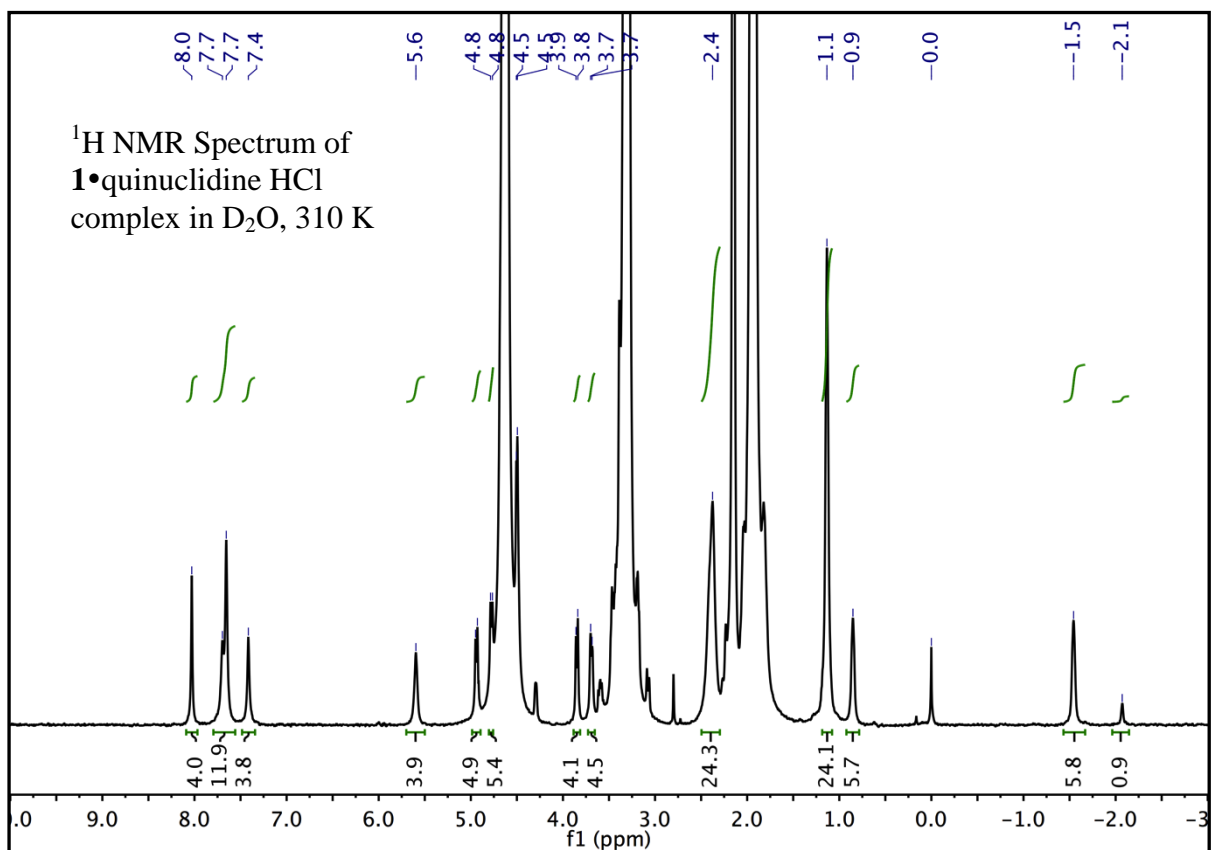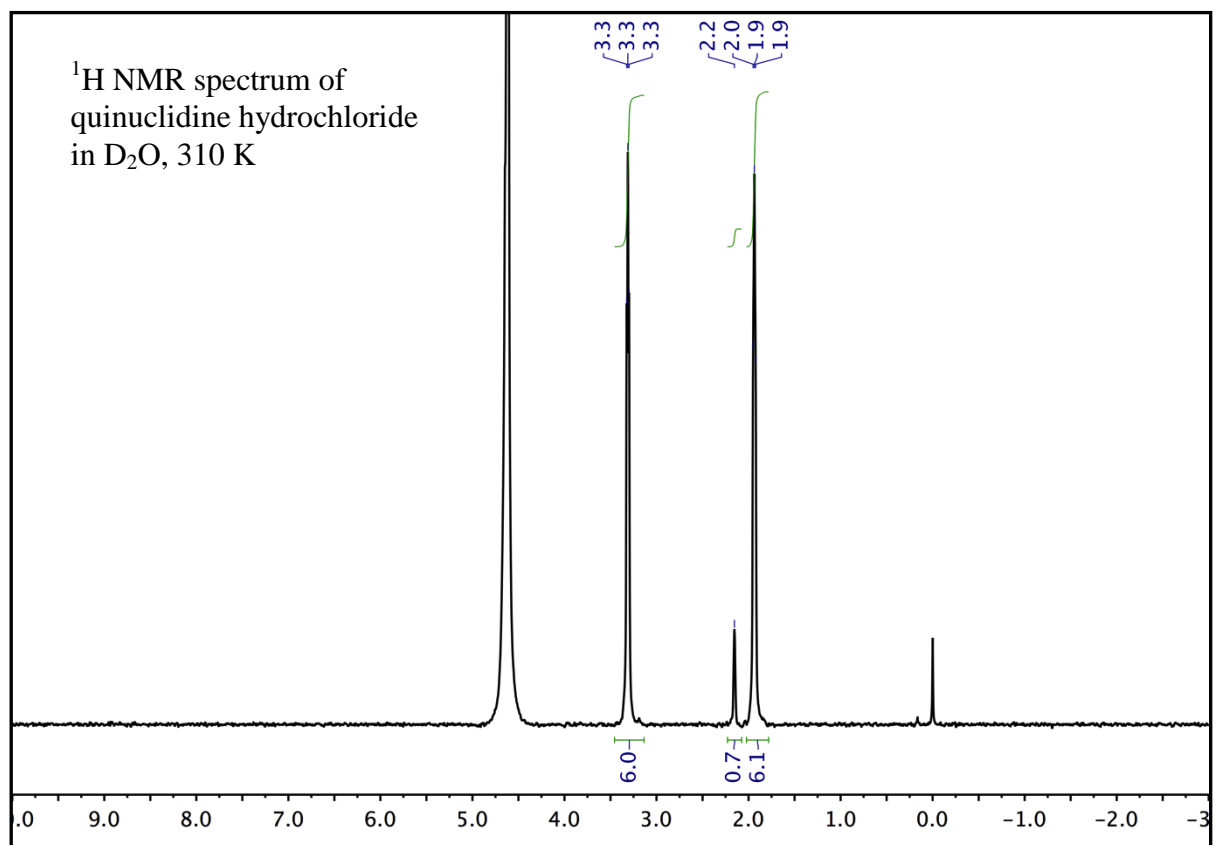

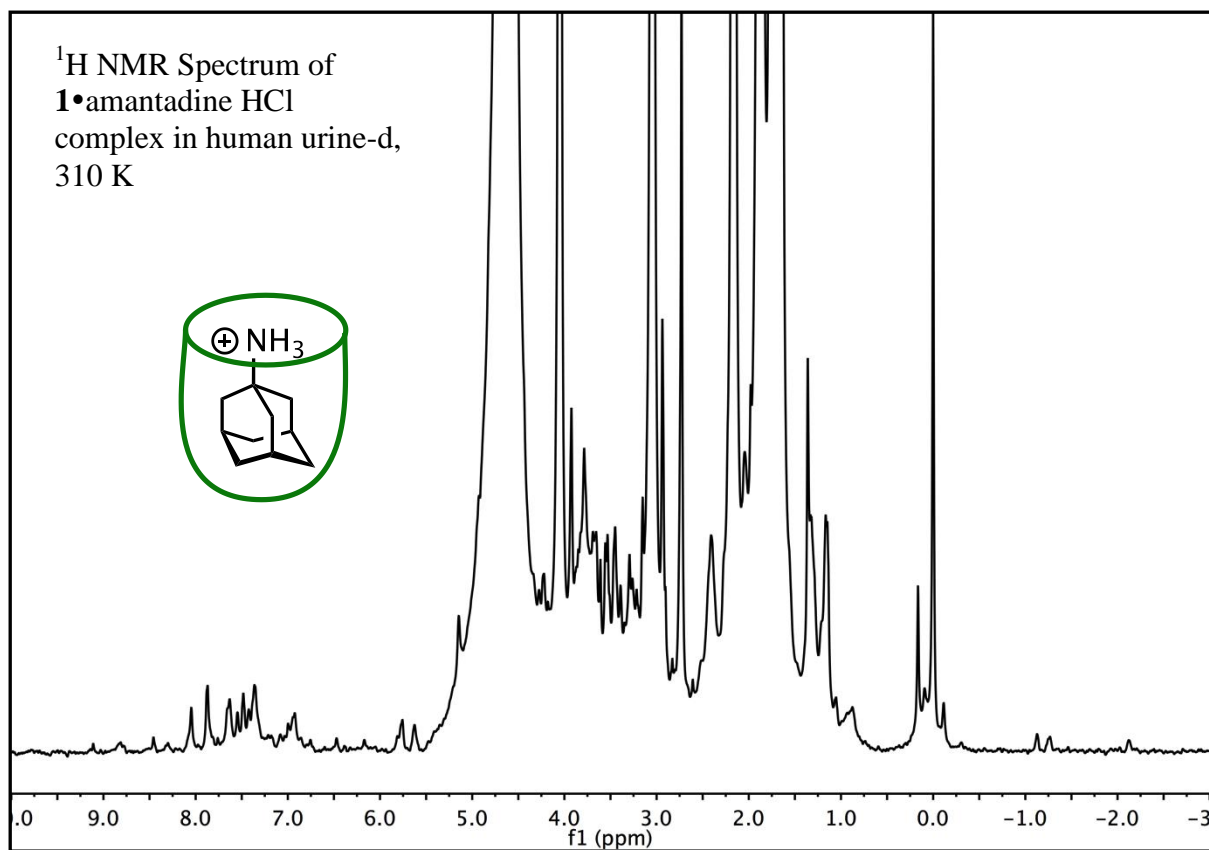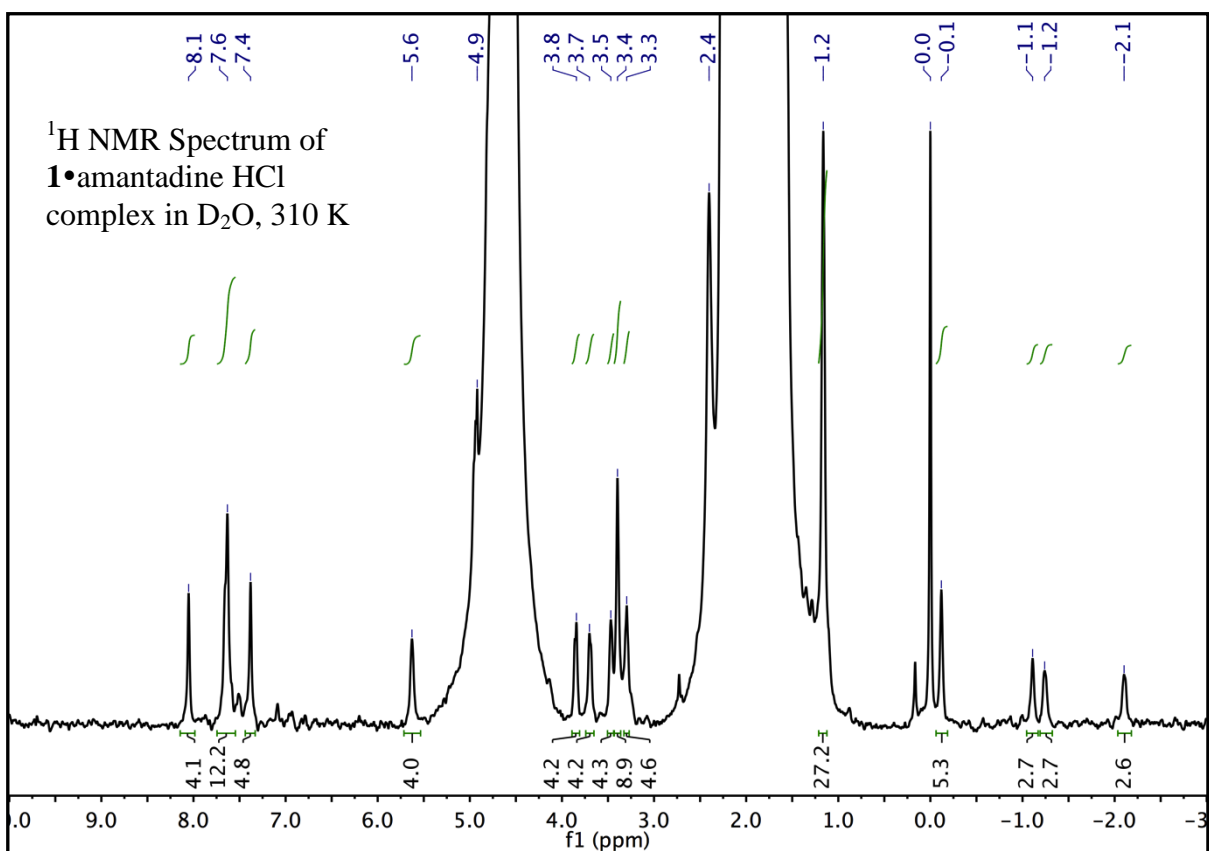

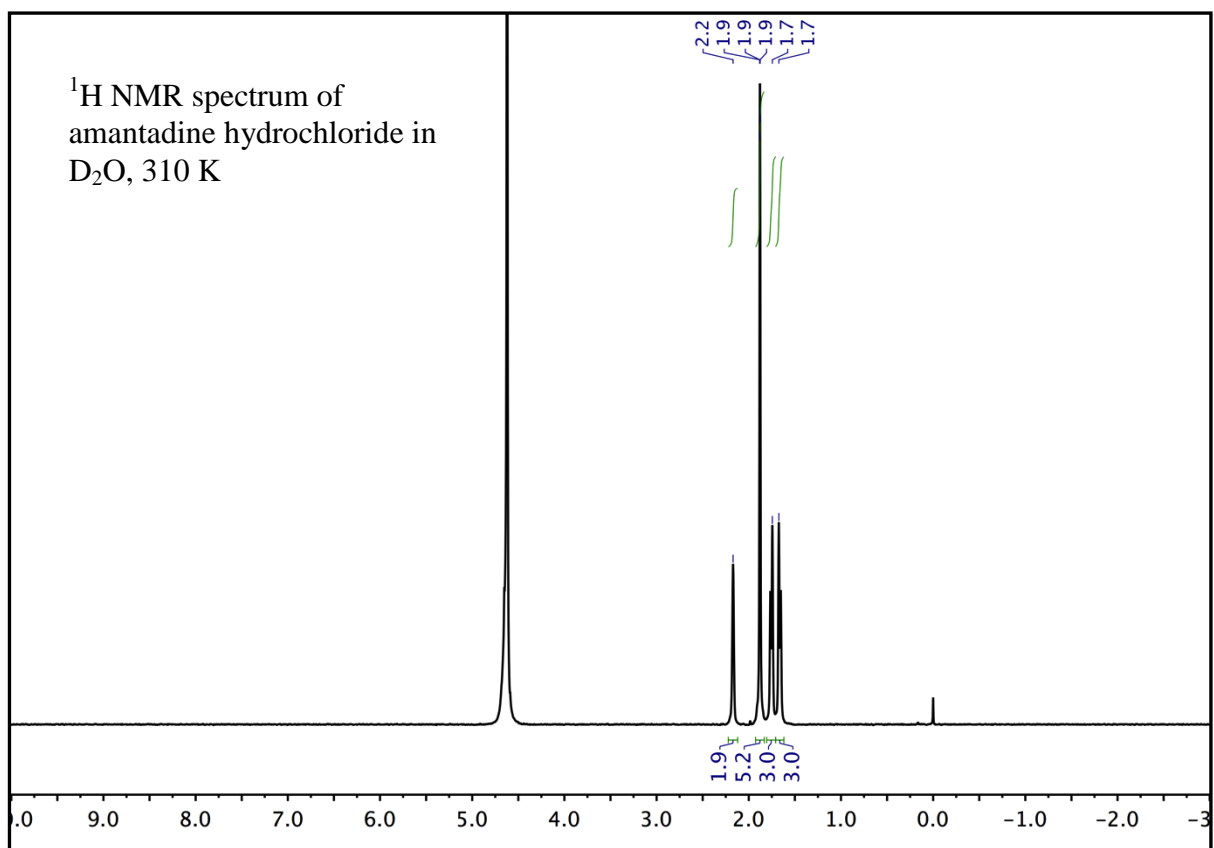

## VII. Model of Cavitant Dimer.

**Figure S1.** Model of Dimeric Velcrand  $\mathbf{1}_2$  (MMFF minimized, with distance constraints for packing of the monomers from reported crystal structures of analogous dimers).<sup>2</sup>

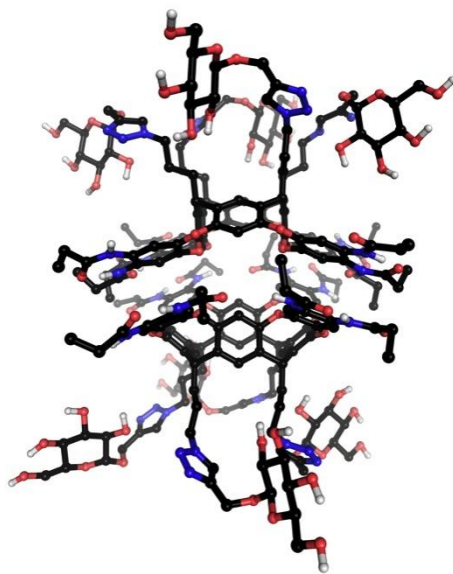

## V. References

- (1) Ryan, D. A.; Rebek Jr., J. *J. Am. Chem. Soc.* **2011**, *133*, 19653.
- (2) Pirondini, L.; Stendardo, A. G.; Geremia, S.; Campagnolo, M.; Samorì, P.; Rabe, J. P.; Fokkens, R.; Dalcanale, E. *Angew. Chem. Int. Ed.* **2003**, *42*, 1384.
